# Supplementary material for: Predictive power of UKCAT and other pre-admission measures for performance in a medical school in Glasgow: a cohort study
Source: PubMed Central journal article supplement (PMC4063234; doi:10.1186/1472-6920-14-116), 2014-06-11
Supplement: 1472-6920-14-116-S1.pdf [file 1472-6920-14-116-S1.pdf]

(COPY)

Interviewer 1

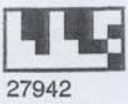

# UNIVERSITY OF GLASGOW MEDICAL SCHOOL MBChB INTERVIEW SCORING SYSTEM

1

Name: [REDACTED]

UCAS number: [REDACTED]

Date of interview: [REDACTED]

Time of interview: [REDACTED]

### 1. Commitment to Medicine:

Demonstrate personal research into what a career in medicine entails  
Provide evidence of attempts to experience the work of a doctor (bear in mind that not all applicants have the opportunity to do this)  
Demonstrates knowledge of current issue in medical science

Score (please shade ONE bubble)      1      2      3      4      5  
                       

### 2. Understanding of Core Qualities of a Doctor:

Demonstrate an understanding that patient care is the primary duty of a doctor  
Demonstrate good communication skills and listening skills  
Evidence of concern for the welfare of other (humanity)  
Personal Qualities of honesty, integrity, and ability to recognise own limitation

Score (please shade ONE bubble)      1      2      3      4      5  
                       

### 3. Team Work/Other Interests:

Understanding of how to work as part of a team  
Evidence of endeavours in non academic areas

Score (please shade ONE bubble)      1      2      3      4      5  
                       

### 4. Knowledge of Glasgow Curriculum:

Understanding of PBL  
Other areas of curriculum eg clinical skills, VS, SSCs  
Demonstrate more than just what is on website

Score (please shade ONE bubble)      1      2      3      4      5  
                       

### 5. Overall:

All things considered, this candidate has the potential to cope well with a medical education and career.

Score (please shade ONE bubble)      1      2      3      4      5  
                       

Interviewer's signature:

Interviewer's name: [REDACTED]
